# Supplementary material
Source: PubMed Central journal article supplement (PMC1976241)

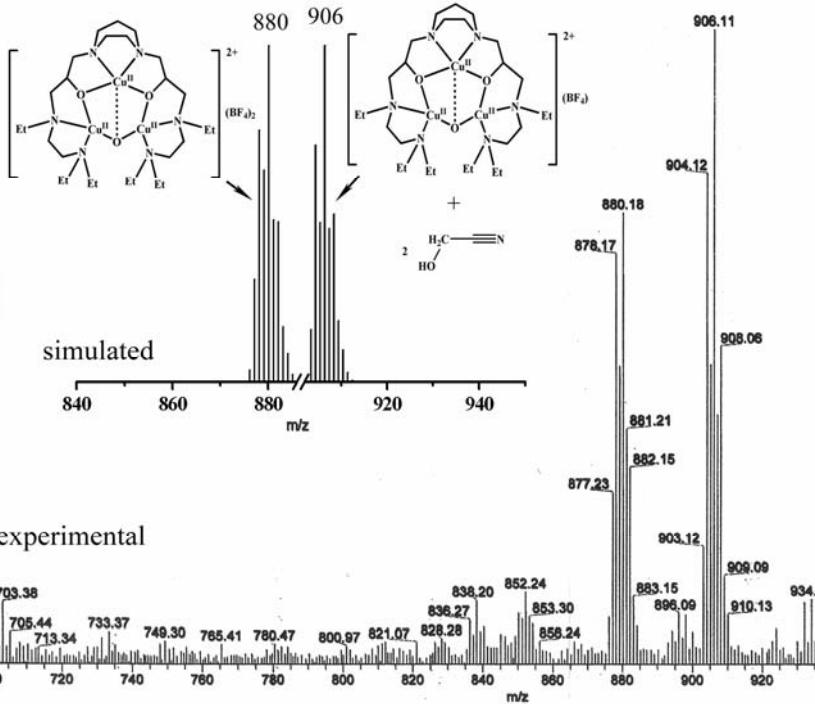

Supplement: pnas_0707119104_1.pdf [file pnas_0707119104_1.pdf]

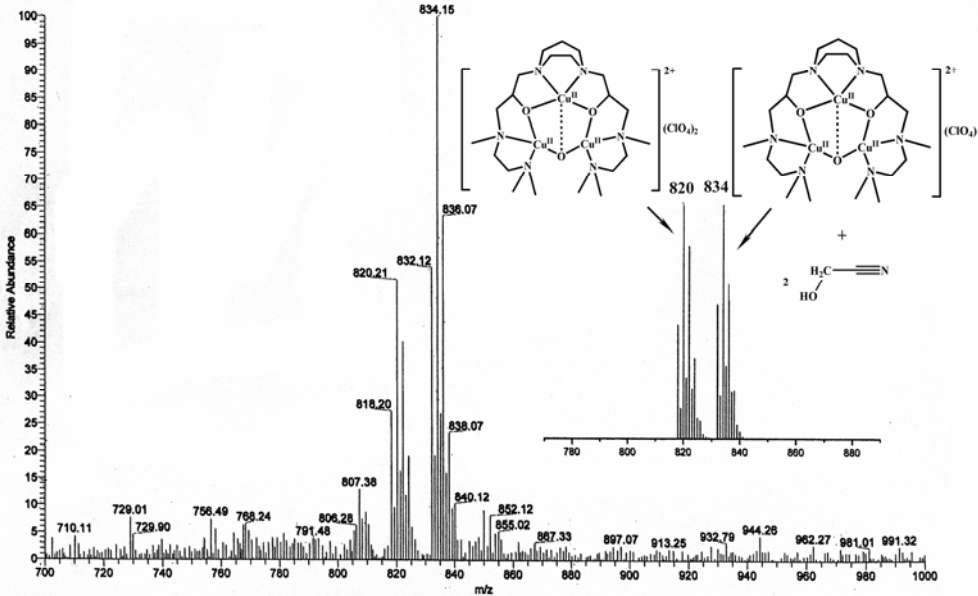

Supplement: pnas_0707119104_2.pdf [file pnas_0707119104_2.pdf]

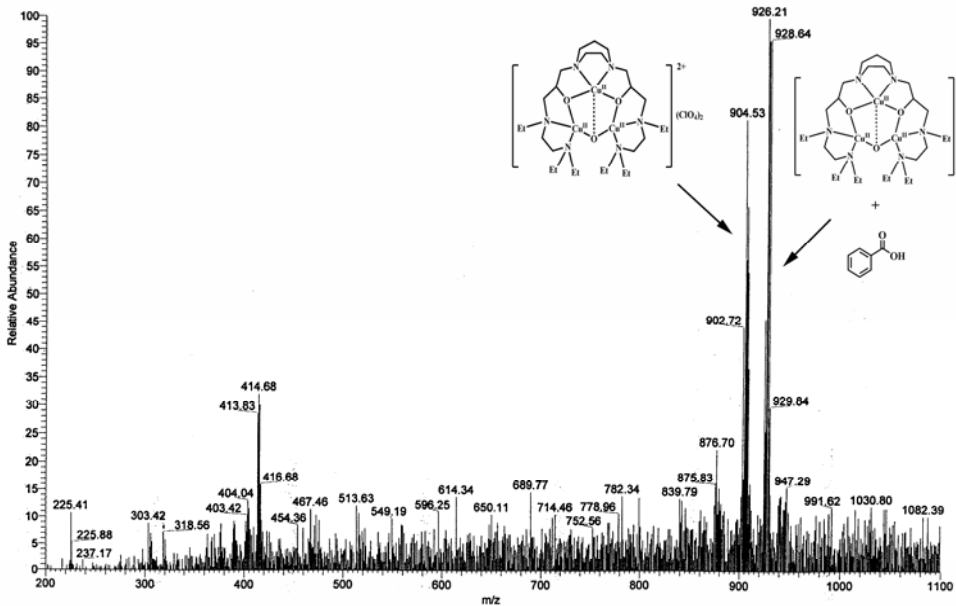

Supplement: pnas_0707119104_3.pdf [file pnas_0707119104_3.pdf]

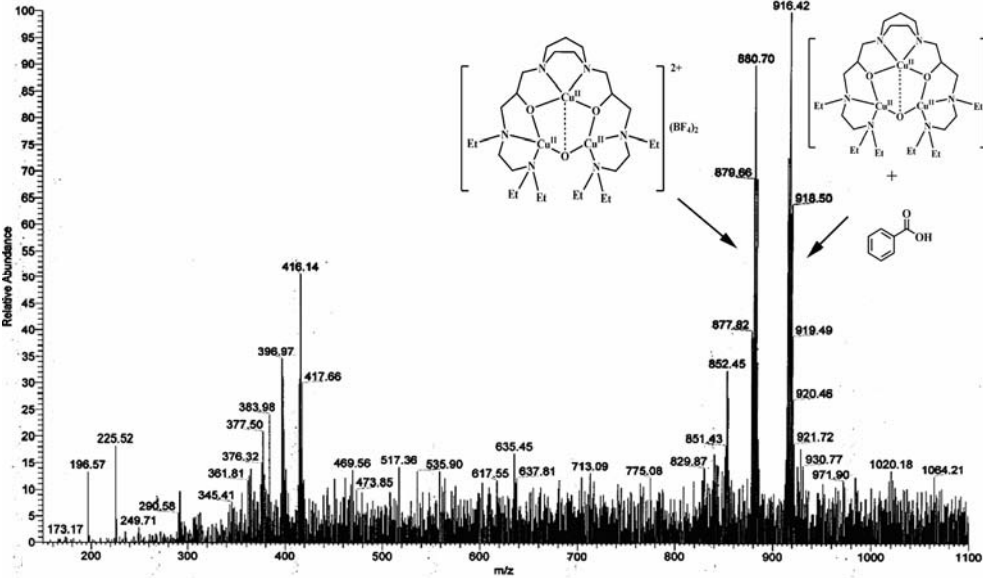

Supplement: pnas_0707119104_4.pdf [file pnas_0707119104_4.pdf]

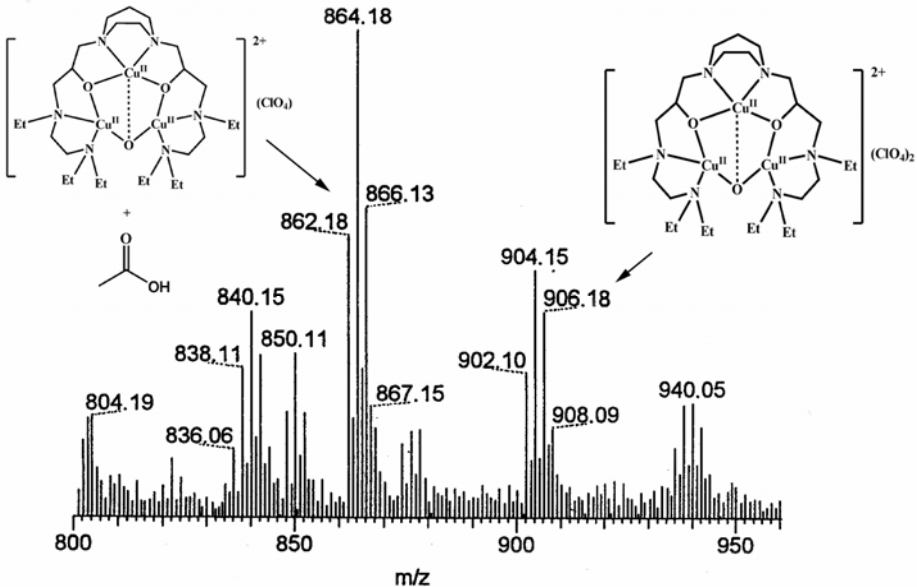

Supplement: pnas_0707119104_5.pdf [file pnas_0707119104_5.pdf]

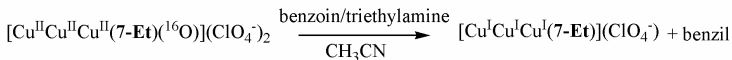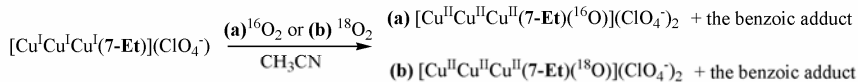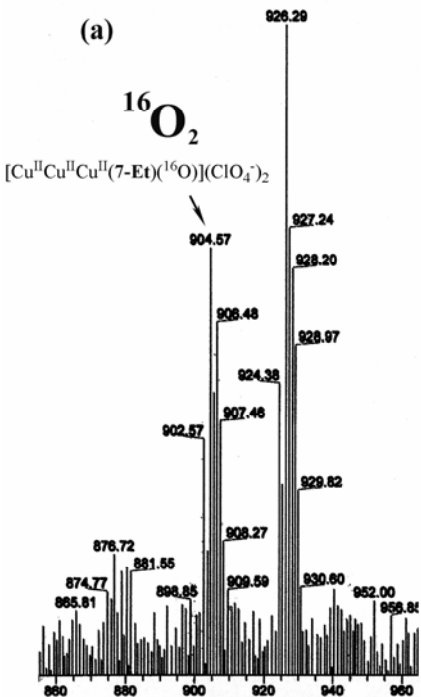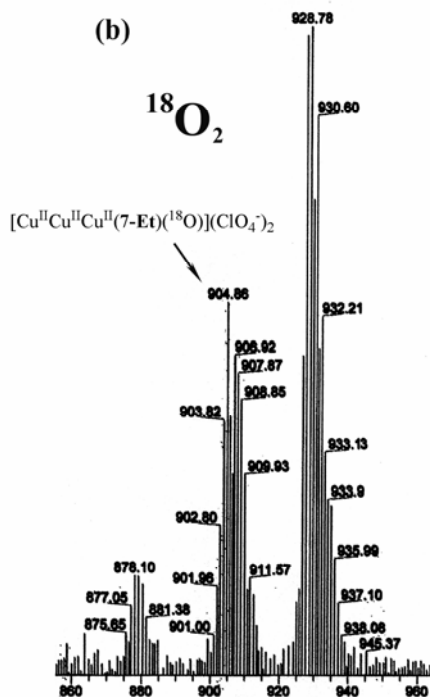

Supplement: pnas_0707119104_6.pdf [file pnas_0707119104_6.pdf]

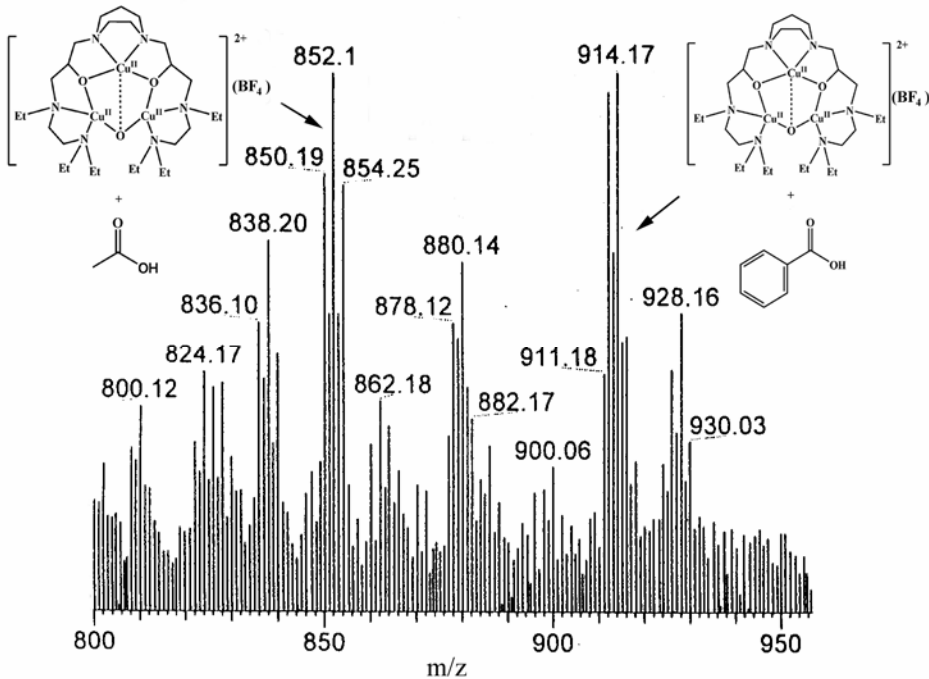

Supplement: pnas_0707119104_7.pdf [file pnas_0707119104_7.pdf]

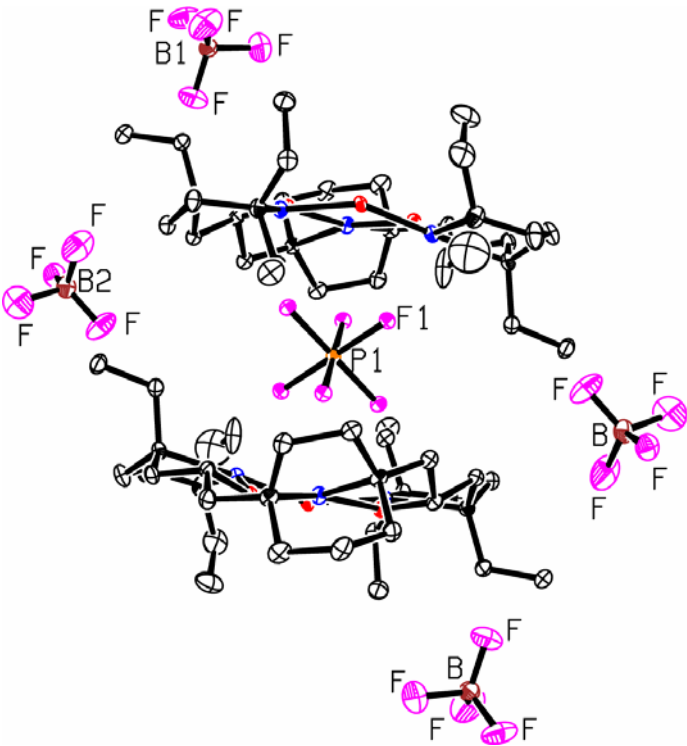

Supplement: pnas_0707119104_8.pdf [file pnas_0707119104_8.pdf]
